# Supplementary material for: Highly efficient rare-earth free vanadate phosphors for WLEDs
Source: Royal Society of Chemistry journal article supplement (doi:10.1039/d3dt03138a), 2023-01-01
Supplement: d3dt03138a1.pdf [file d3dt03138a1.pdf]

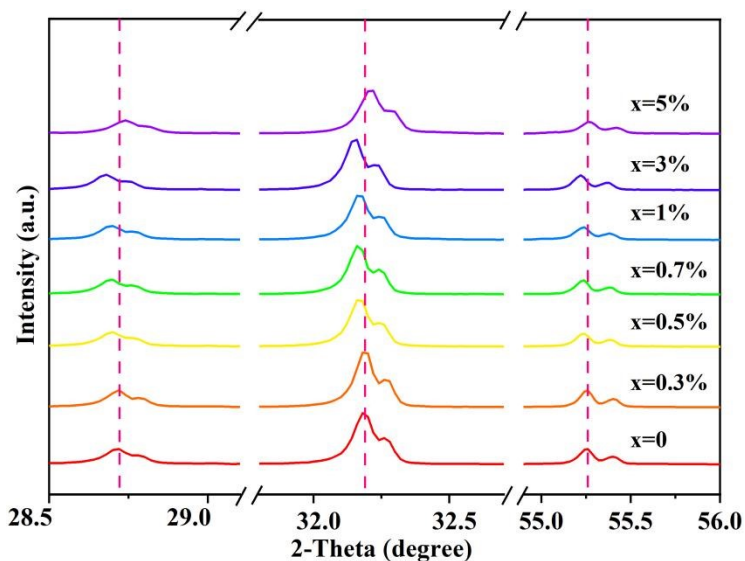

Fig. S1. Magnified XRD peaks corresponding to (400), (420), and (642) crystal planes.

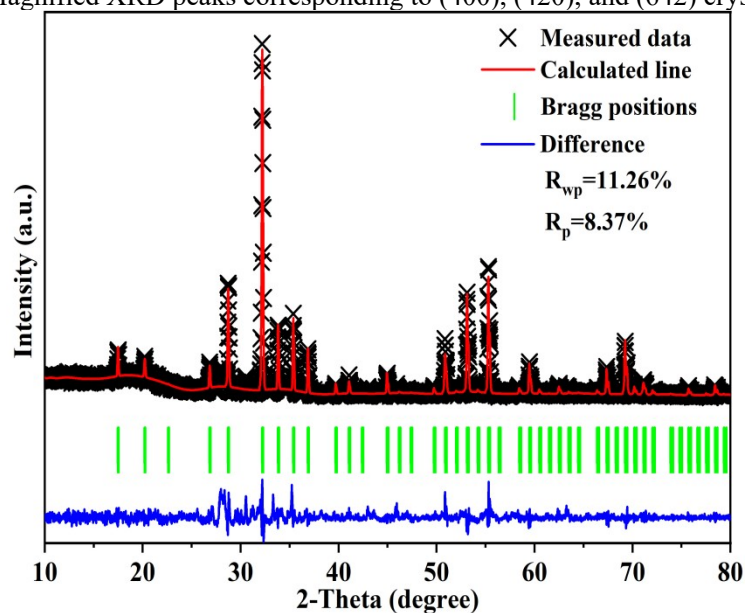

Fig. S2. Rietveld refinement of the XRD pattern of the CMV: 0.5%Ta<sup>5+</sup> sample.

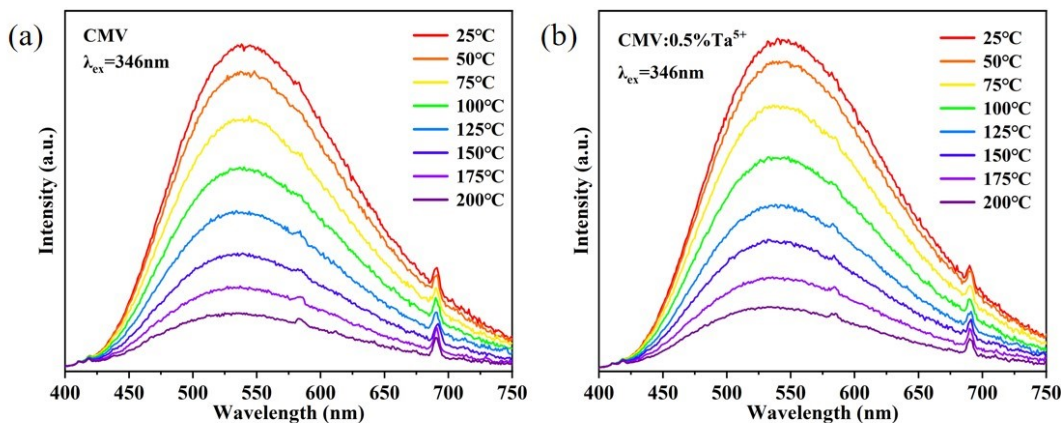

Fig. S3. The relationship between normalized intensity of CMV (a), CMV: 0.5%Ta<sup>5+</sup> (b) and temperature.
