# Supplementary material for: Highly efficient rare-earth free vanadate phosphors for WLEDs
Source: Royal Society of Chemistry journal article supplement (doi:10.1039/d3dt03138a), 2023-01-01
Supplement: d3dt03138a2.pdf [file d3dt03138a2.pdf]

# Supporting Information for

## Highly Efficient Rare-Earth Free Vanadate Phosphors for WLEDs

Zhaojiang Liu, Yujuan Dong\*, Man Fu, Chuang Wang\*

College of Chemistry and Materials Engineering, Bohai University, Jinzhou, 121000,  
P. R. China.

Corresponding author's email: dongyujuan@qymail.bhu.cn;

wangchuangbhu@163.com

### This Word file includes:

Fig. S1. Magnified XRD peaks corresponding to (400), (420), and (642) crystal planes.

Fig. S2. Rietveld refinement of the XRD pattern of the CMV: 0.5%Ta<sup>5+</sup> sample.

Fig. S3. The relationship between normalized intensity of CMV (a), CMV: 0.5%Ta<sup>5+</sup> (b) and temperature.

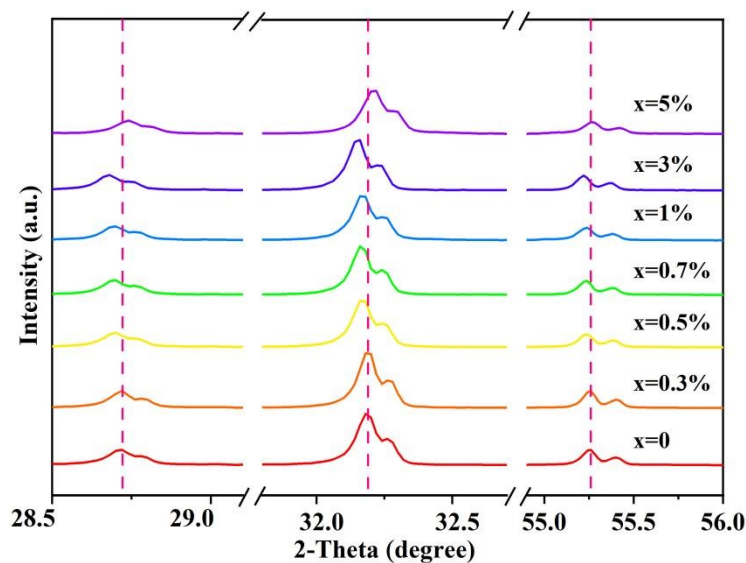

Fig. S1. Magnified XRD peaks corresponding to (400), (420), and (642) crystal planes.

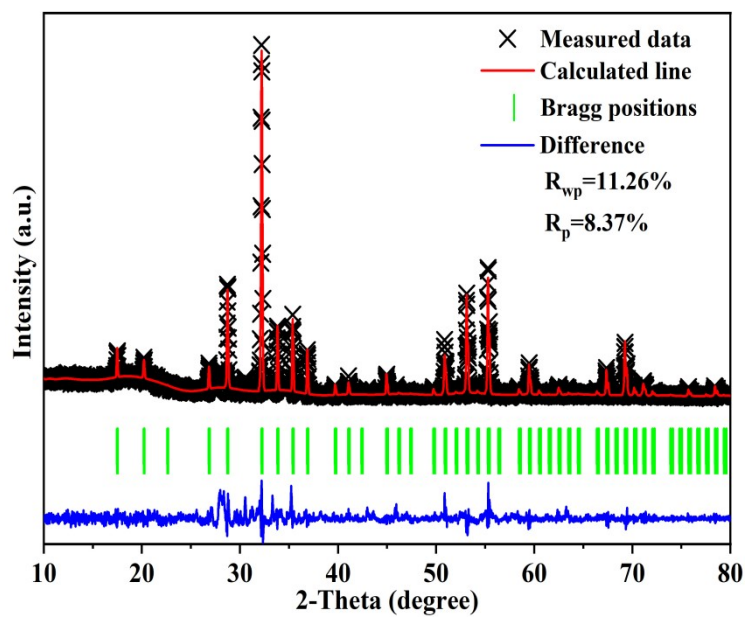

Fig. S2. Rietveld refinement of the XRD pattern of the CMV: 0.5%Ta<sup>5+</sup> sample.

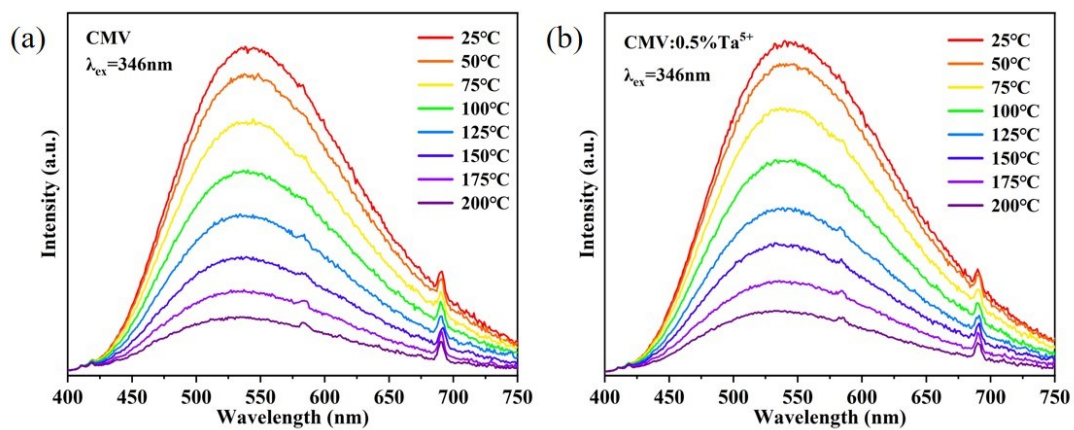

Fig. S3. The relationship between normalized intensity of CMV (a), CMV: 0.5%Ta<sup>5+</sup> (b) and temperature.
